# Supplementary material for: Antidepressant Use and Risk of Manic Episodes in Children and Adolescents With Unipolar Depression
Source: PubMed Central journal article supplement (PMC10534997; doi:10.1001/jamapsychiatry.2023.3555), 2023-09-27
Supplement: jamapsychiatry-e233555-s002.pdf [file jamapsychiatry-e233555-s002.pdf]

## Data Sharing Statement

Virtanen. Antidepressant Use and Risk of Manic Episodes in Children and Adolescents With Unipolar Depression. *JAMA Psychiatry*. Published September 27, 2023.  
doi:10.1001/jamapsychiatry.2023.3555

### Data

**Data available:** No

### Additional Information

**Explanation for why data not available:** The data that support the findings of this study are available from Statistics Sweden and The Swedish National Board of Health and Welfare, but restrictions apply to the availability of these data, which were used with ethical permission for the current study and therefore are not publicly available.
